# Supplementary material for: Microbial nanocellulose biotextiles for a circular materials economy
Source: Royal Society of Chemistry journal article supplement (doi:10.1039/d2va00050d), 2022-01-01
Supplement: d2va00050d1.pdf [file d2va00050d1.pdf]

# High-Performance, Regenerative Microbial Nanocellulose Textiles

Environmental  
Science:  
Advances

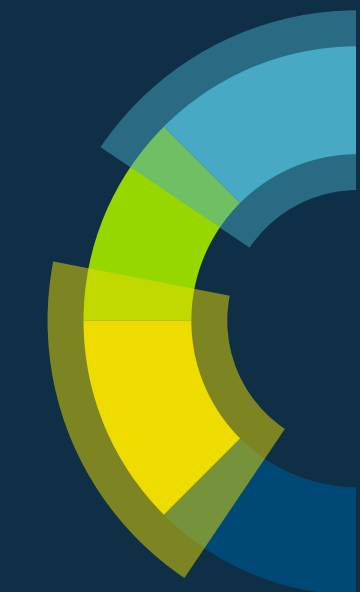

The current textile industry is responsible for considerable waste production, carbon emission, and pollution

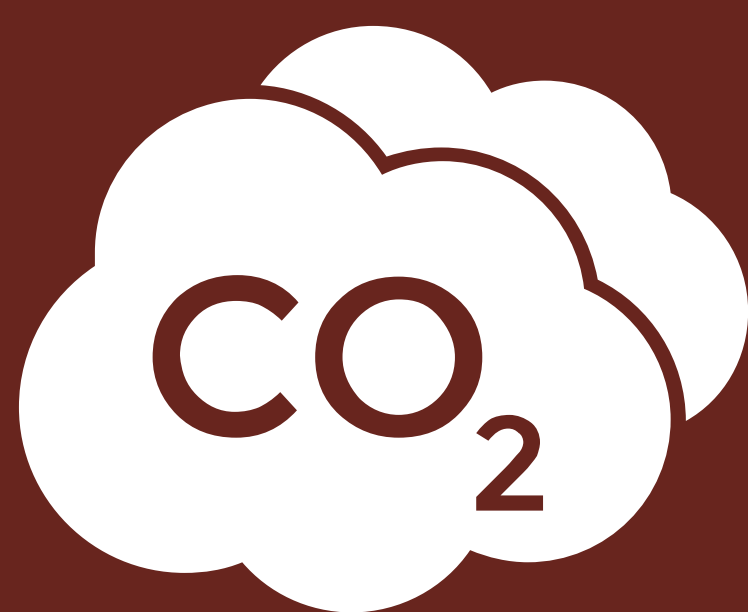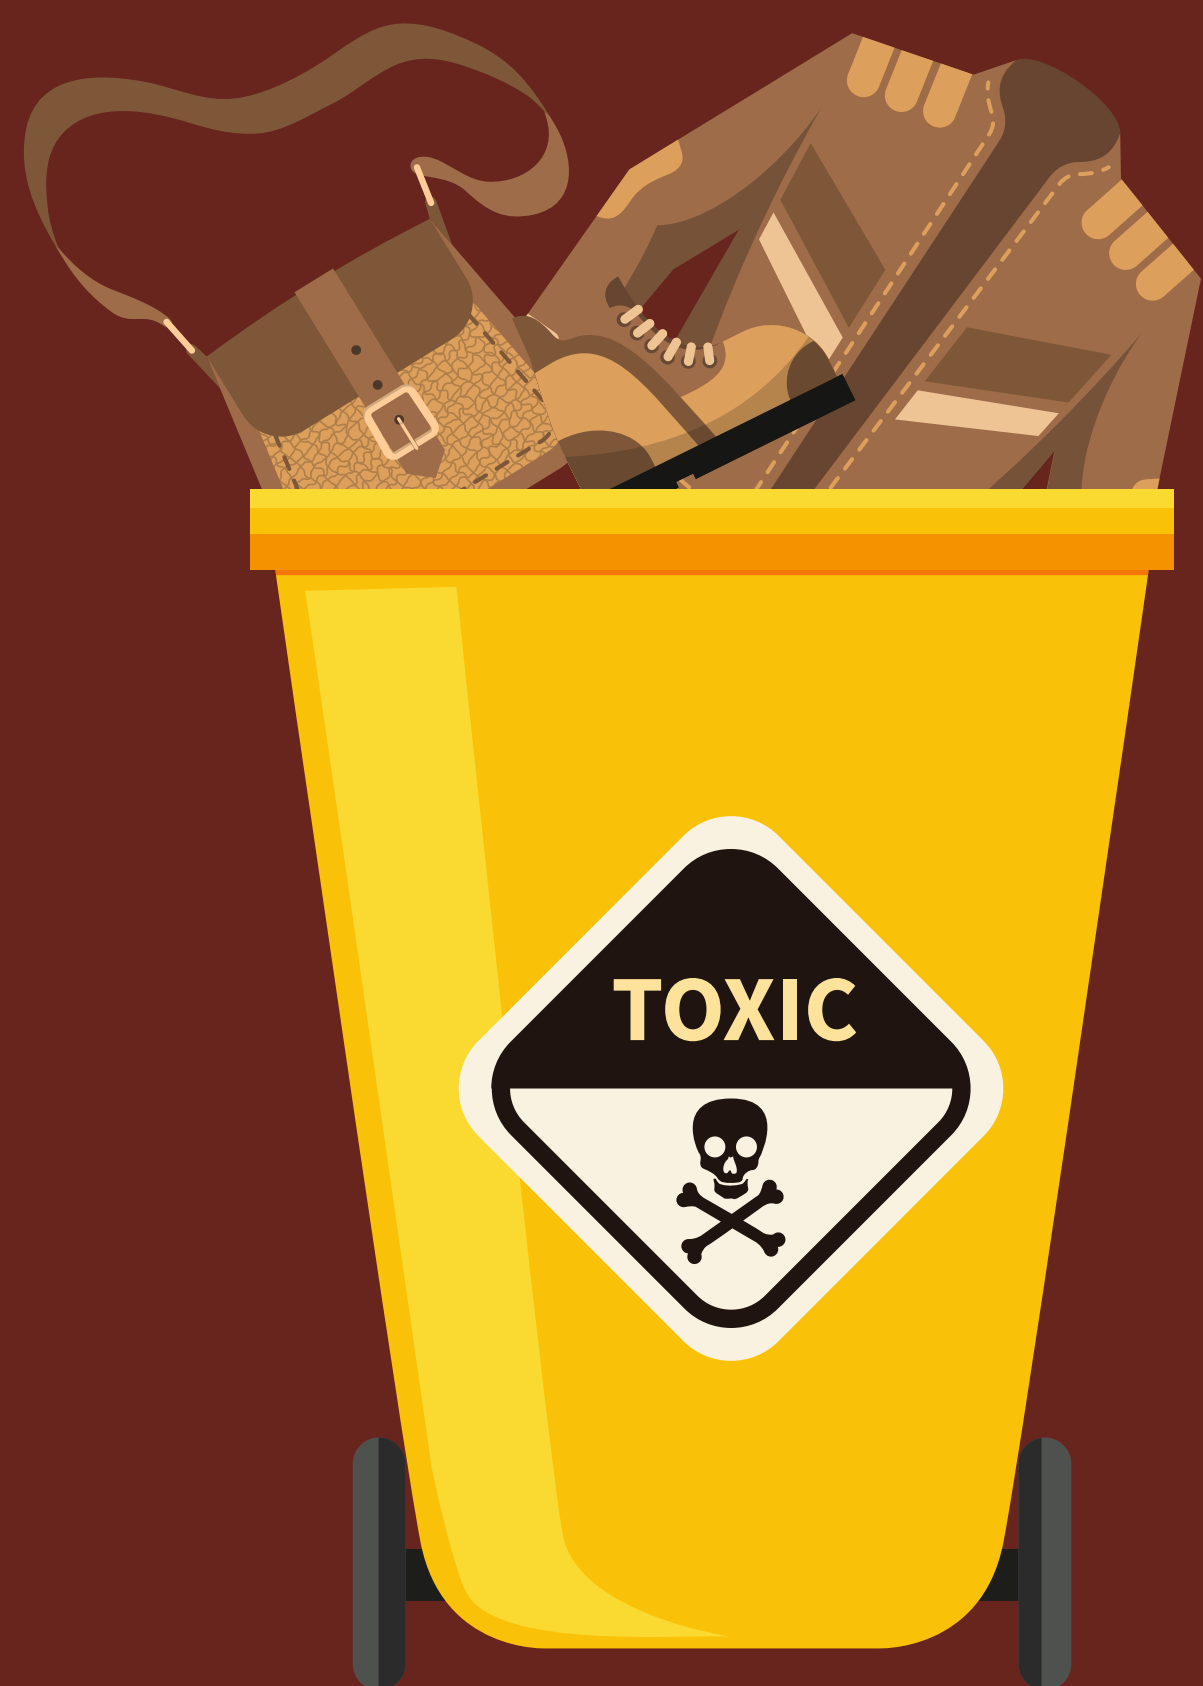

Could microbial biofabrication coupled with green processing methods help transition to a circular textile economy?

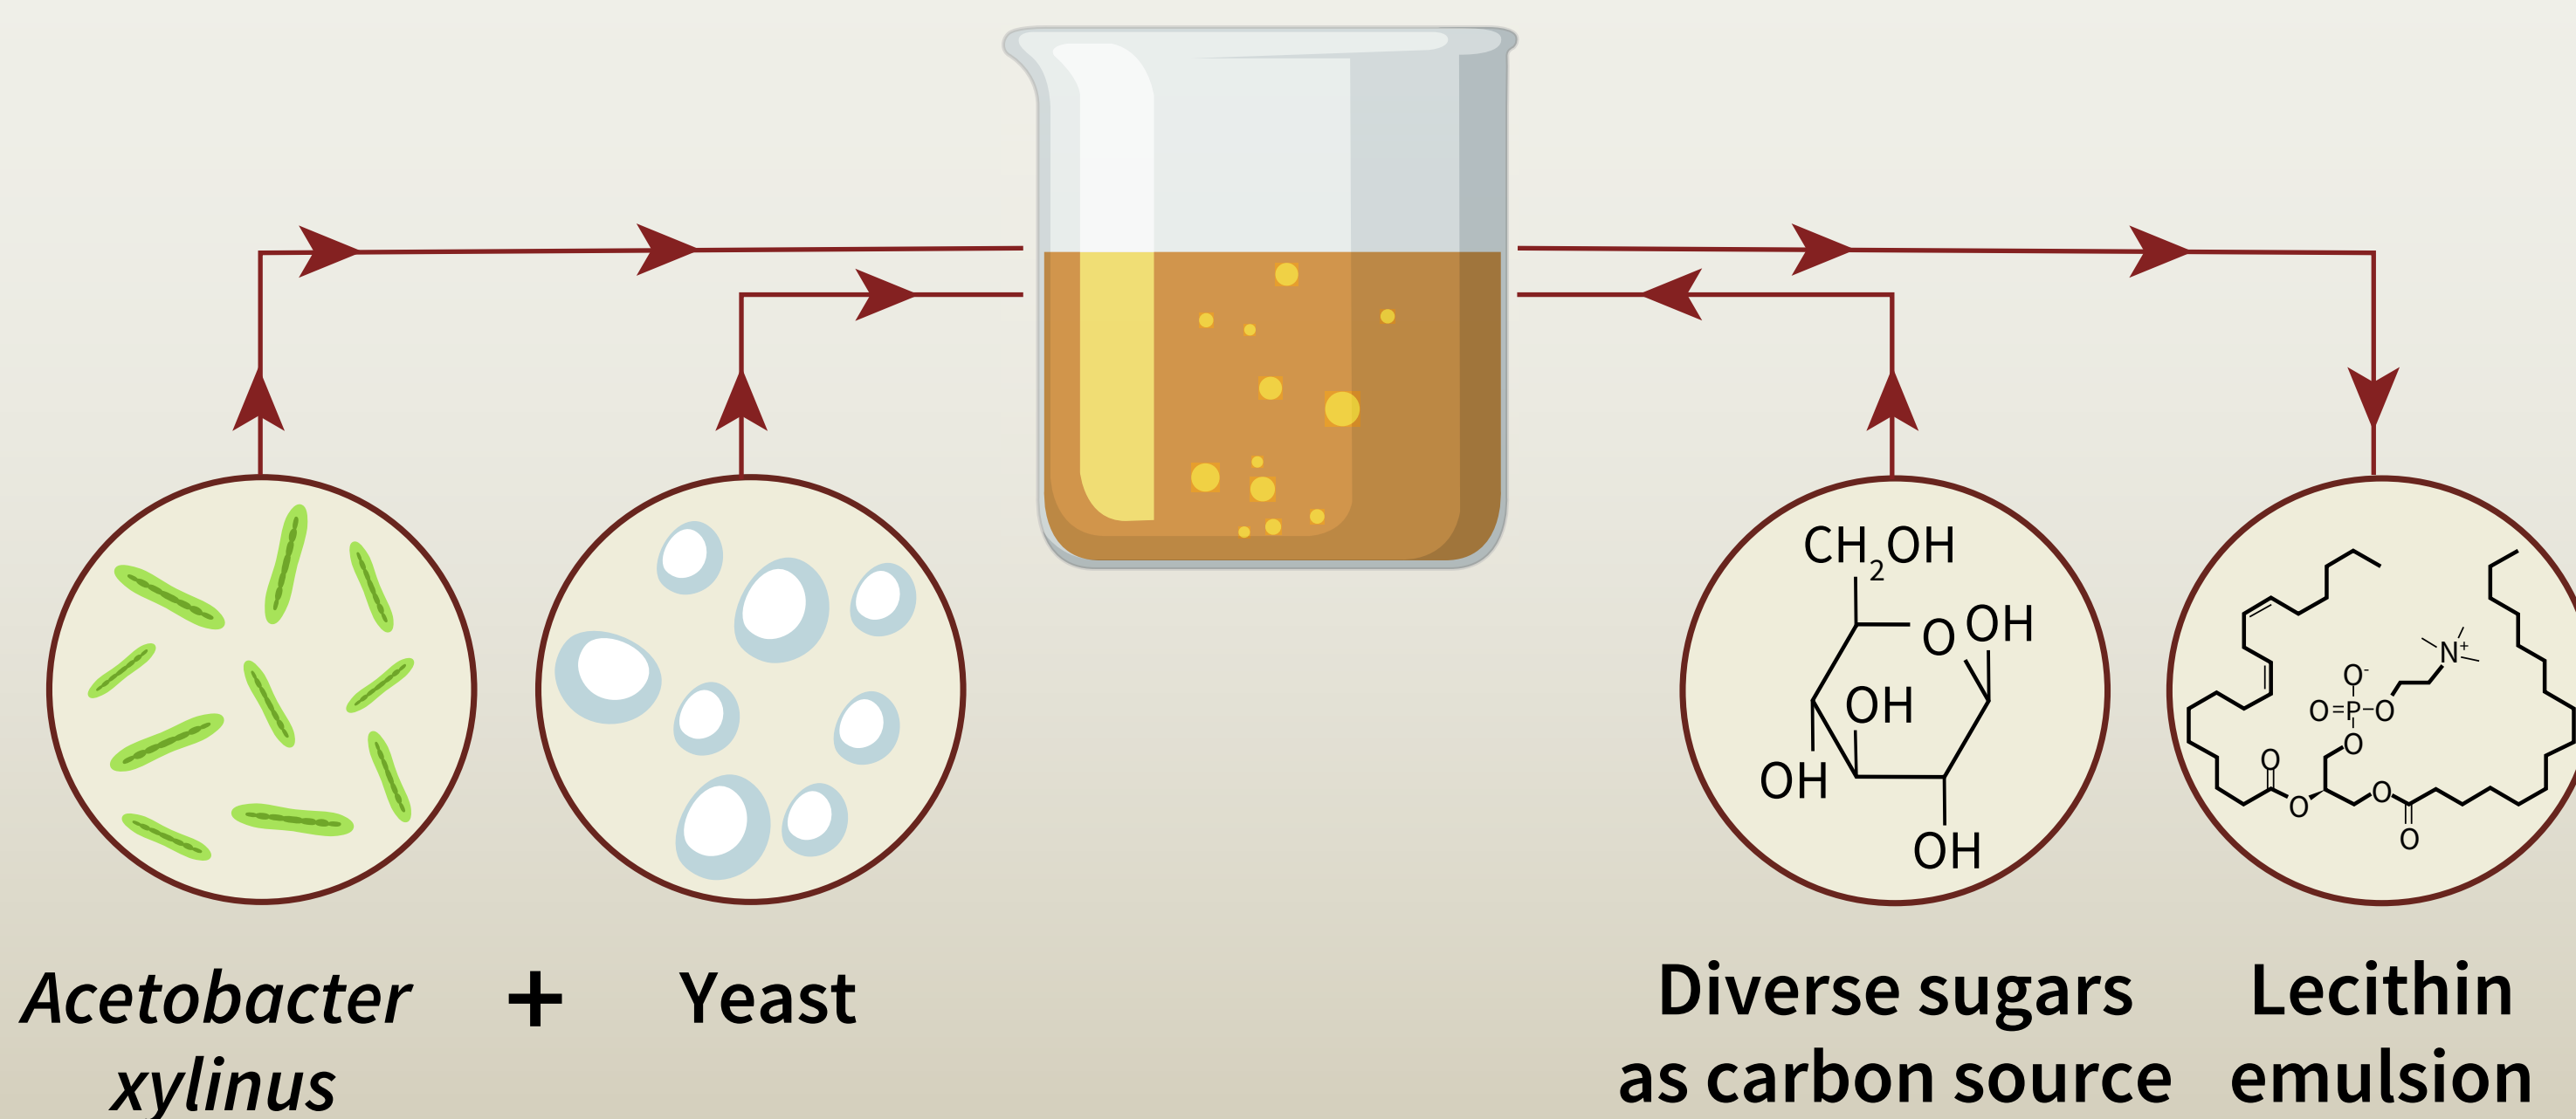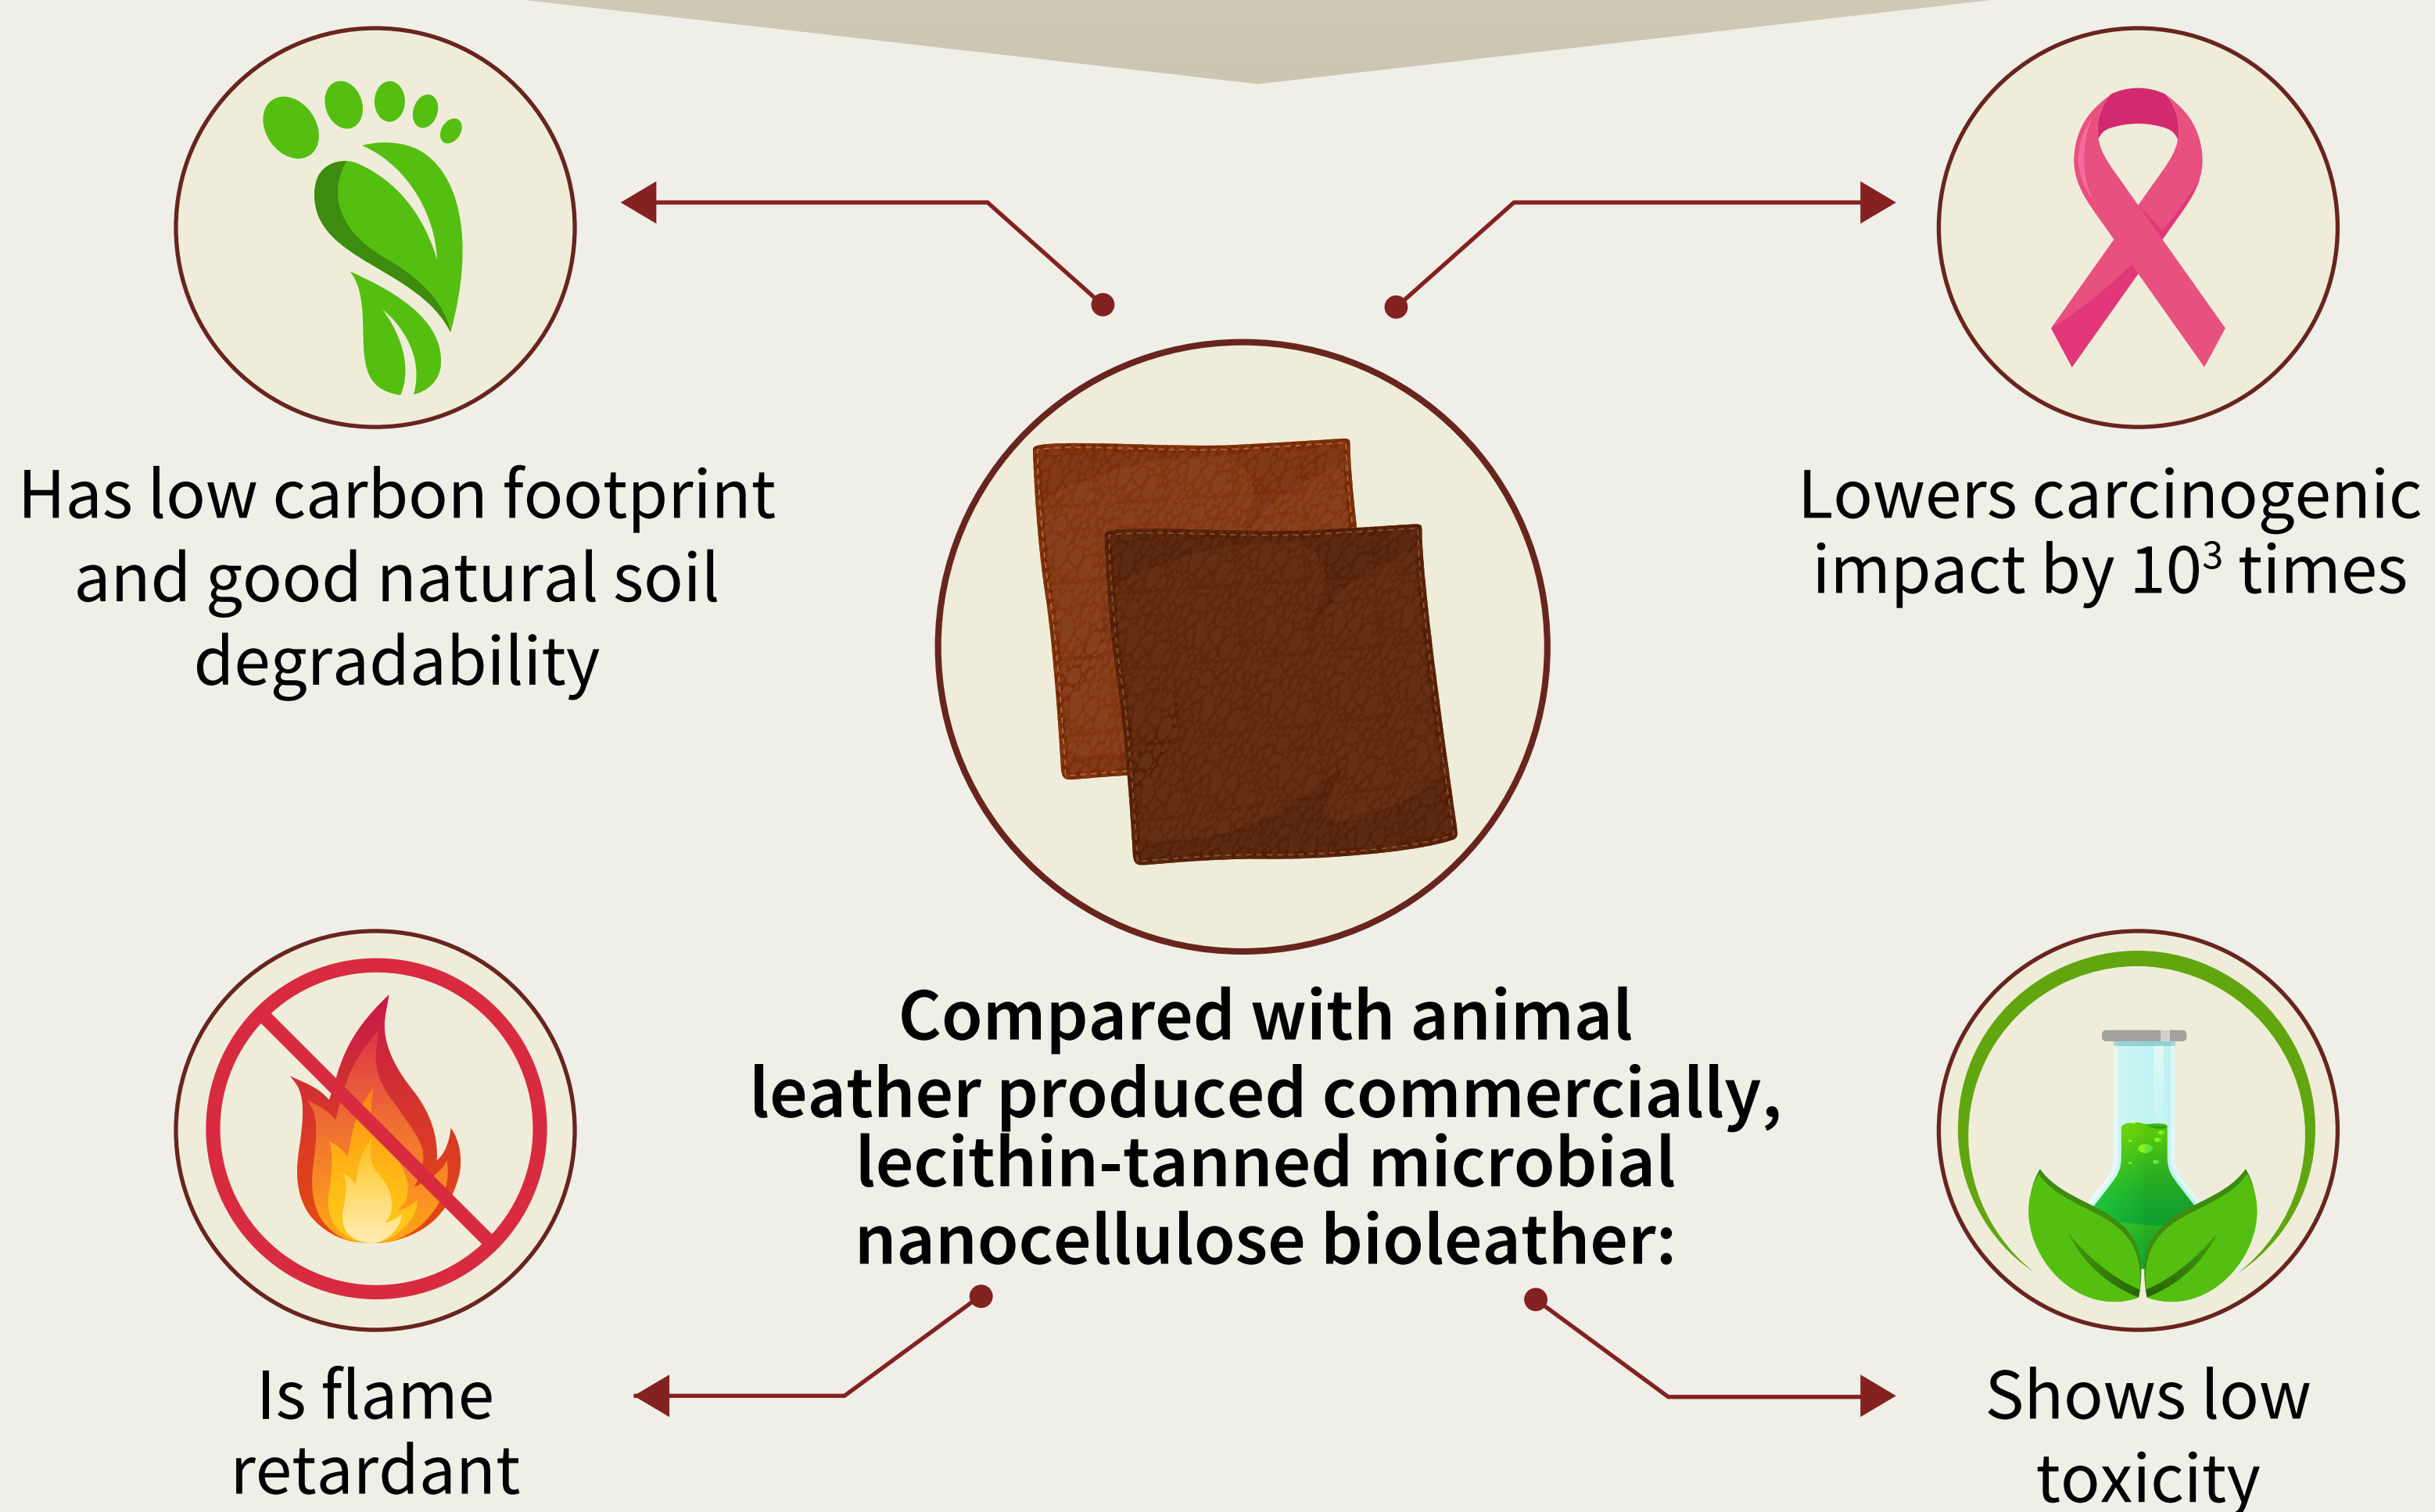

Microbial biofabrication of textiles can help transition to a sustainable, circular materials economy
